# Supplementary material
Source: PubMed Central journal article supplement (PMC2939218)

# Supporting Materials

## Structural Refinement of the hERG1 pore and voltage-sensing domain with ROSETTA-TM modeling and Molecular-Dynamics Simulations

**Table S1.** Used docking parameters for hERG blockers and activators:

(i) AUTODOCK docking program.

| <i>Parameters used for blind docking (whole receptor's atoms were used in the mapping of binding site) of ligands</i>          |                  |
|--------------------------------------------------------------------------------------------------------------------------------|------------------|
| Parameters                                                                                                                     | Used value       |
| Number of grid points in each direction                                                                                        | 126              |
| Grid spacing                                                                                                                   | 0.75 Å           |
| Grid map dimension in each direction                                                                                           | 94.5 Å           |
| Number of hybrid GA-LS runs                                                                                                    | 200              |
| Grid Center                                                                                                                    | 0.0 0.0 0.0      |
| <i>Parameters used for partitioned docking (focused region of receptor was used in the mapping of binding site) of ligands</i> |                  |
| Number of grid points in each direction                                                                                        | 126              |
| Grid spacing                                                                                                                   | 0.4 Å            |
| Grid map dimension in each direction                                                                                           | 50.4 Å           |
| Number of hybrid GA-LS runs                                                                                                    | 200              |
| Grid Center                                                                                                                    | 9.00, 8.00, 5.00 |

(ii) GOLD docking program.

| <i>Parameters used for blind docking (whole receptor's atoms were used in the mapping of binding site) of ligands</i> |            |
|-----------------------------------------------------------------------------------------------------------------------|------------|
| Parameters                                                                                                            | Used value |
| Maximum length of grid point list                                                                                     | 148        |
| Grid spacing                                                                                                          | 0.75 Å     |
| Calculated cavity radius                                                                                              | 83.6 Å     |

|                                                                                                                                |                  |
|--------------------------------------------------------------------------------------------------------------------------------|------------------|
| Calculated cavity origin                                                                                                       | 1.87 -1.71 1.27  |
| Population size                                                                                                                | 100              |
| Selection pressure                                                                                                             | 1.1              |
| Number of islands                                                                                                              | 5                |
| Migrate                                                                                                                        | 10               |
| Mutate                                                                                                                         | 95               |
| Crossover                                                                                                                      | 95               |
| Niche size                                                                                                                     | 2                |
| Number of operation                                                                                                            | 107000           |
| <i>Parameters used for partitioned docking (focused region of receptor was used in the mapping of binding site) of ligands</i> |                  |
| Maximum length of grid point list                                                                                              | 90               |
| Grid spacing                                                                                                                   | 0.3 Å            |
| Calculated cavity radius                                                                                                       | 43.8 Å           |
| Calculated cavity origin                                                                                                       | 2.37, 3.33, 5.93 |
| Population size                                                                                                                | 100              |
| Selection pressure                                                                                                             | 1.1              |
| Number of islands                                                                                                              | 5                |
| Migrate                                                                                                                        | 10               |
| Mutate                                                                                                                         | 95               |
| Crossover                                                                                                                      | 95               |
| Niche size                                                                                                                     | 2                |
| Number of operation                                                                                                            | 125000           |

**Table S2.** Intra and Inter Subunits Salt-Bridge and Hydrogen-Bonding Statistics\* as per atom for S4 voltage sensor.

| $N_{res}^1$ | Atom @ $N_{res}^1$ | $N_{res}^2$ | Atom @ $N_{res}^1$ | Inter vs. Intra** | Lifetime (ps) | Occupancy |       |
|-------------|--------------------|-------------|--------------------|-------------------|---------------|-----------|-------|
| K525        | HN                 | I521        | O                  | intra             | 70.8          | 0.920     |       |
|             | HZ1                | E435        | OE1                | intra             | 16.1          | 0.145     |       |
|             |                    |             | OE2                | intra             | 13.3          | 0.107     |       |
|             | HZ2                | E435        | OE1                | intra             | 14.7          | 0.187     |       |
|             |                    |             | OE2                | intra             | 46.7          | 0.280     |       |
|             |                    |             | E575               | O                 | inter         | 10.0      | 0.003 |
|             | HZ3                | E435        | OE1                | intra             | 11.6          | 0.147     |       |
|             |                    |             | OE2                | intra             | 28.0          | 0.215     |       |
|             | O                  | Q576        | OE1                | inter             | 10.8          | 0.022     |       |
|             |                    |             | R528               | HN                | intra         | 5.4       | 0.045 |
|             | R528               | HN          | L524               | O                 | intra         | 82.2      | 0.932 |
|             |                    |             | K525               | O                 | intra         | 5.4       | 0.045 |
| HE          |                    | D460        | OD1                | intra             | 80.5          | 0.563     |       |
|             |                    |             | OD2                | intra             | 51.3          | 0.393     |       |
| HH11        |                    | D456        | OD1                | intra             | 53.4          | 0.890     |       |
|             |                    |             | OD2                | intra             | 12.9          | 0.498     |       |
|             |                    |             | O                  | intra             | 5.0           | 0.007     |       |
| HH12        |                    | D460        | OD1                | intra             | 27.2          | 0.545     |       |
|             |                    |             | OD2                | intra             | 41.3          | 0.688     |       |
| HH21        |                    | D456        | OD1                | intra             | 10.2          | 0.143     |       |
|             |                    |             | OD2                | intra             | 14.1          | 0.385     |       |
| O           |                    | R531        | HN                 | intra             | 5.7           | 0.127     |       |
|             | HE                 |             | intra              | 29.0              | 0.782         |           |       |
| R531        | HN                 | L529        | O                  | intra             | 5.6           | 0.120     |       |
|             | HH11               | D460        | OD1                | intra             | 25.7          | 0.600     |       |
|             |                    |             | OD2                | intra             | 39.9          | 0.745     |       |
|             | HH21               | D460        | OD1                | intra             | 27.5          | 0.220     |       |
|             |                    |             | OD2                | intra             | 29.2          | 0.302     |       |
|             | HH22               | S428        | OG                 | intra             | 328.3         | 0.985     |       |
| O           | R534               | HN          | intra              | 19.4              | 0.732         |           |       |
|             | V535               | HN          | intra              | 5.4               | 0.022         |           |       |
| R534        | HN                 | R531        | O                  | intra             | 19.4          | 0.732     |       |
|             | HH11               | D466        | OD1                | intra             | 36.9          | 0.528     |       |
|             |                    |             | OD2                | intra             | 27.8          | 0.380     |       |
|             |                    | D501        | OD1                | intra             | 12.5          | 0.017     |       |
|             |                    |             | OD2                | intra             | 5.0           | 0.002     |       |
|             | HH12               | D466        | OD1                | intra             | 10.0          | 0.003     |       |
| OD2         |                    |             | intra              | 30.0              | 0.010         |           |       |

|      |      |      |      |       |       |       |
|------|------|------|------|-------|-------|-------|
|      | HH21 | D466 | OD1  | intra | 29.4  | 0.422 |
|      |      |      | OD2  | intra | 44.0  | 0.367 |
|      |      | D501 | OD1  | intra | 55.0  | 0.073 |
|      |      |      | OD2  | intra | 10.0  | 0.007 |
|      |      |      | O    | intra | 17.5  | 0.012 |
|      | HH22 | D501 | OD1  | intra | 268.3 | 0.268 |
|      |      |      | OD2  | intra | 322.5 | 0.645 |
|      |      |      | O    | intra | 15.6  | 0.047 |
|      |      | A504 | O    | intra | 10.0  | 0.007 |
|      | O    | W497 | HE   | intra | 5.0   | 0.002 |
|      |      | R537 | HN   | intra | 6.9   | 0.103 |
|      |      | K538 | HN   | intra | 9.4   | 0.168 |
| R537 | HN   | V533 | O    | intra | 20.7  | 0.310 |
|      |      | R534 | O    | intra | 6.9   | 0.103 |
|      |      | V535 | O    | intra | 5.0   | 0.007 |
|      | HH11 | D466 | OD1  | intra | 190.0 | 0.253 |
|      |      |      | OD2  | intra | 228.3 | 0.457 |
|      |      | N470 | OD1  | intra | 14.8  | 0.163 |
|      | HH12 | D501 | OD1  | intra | 87.2  | 0.582 |
|      |      |      | OD2  | intra | 27.3  | 0.555 |
|      | HH21 | D466 | OD1  | intra | 21.6  | 0.438 |
|      |      |      | OD2  | intra | 16.8  | 0.420 |
|      |      | N470 | OD1  | intra | 6.5   | 0.037 |
|      | HH22 | K495 | O    | intra | 5.0   | 0.002 |
|      | O    | L539 | HN   | intra | 6.7   | 0.007 |
|      |      | D540 | HN   | intra | 12.8  | 0.362 |
|      | K538 | HN   | V535 | O     | intra | 9.4   |
| L539 |      |      | O    | intra | 11.8  | 0.358 |
| O    |      | D540 | NH   | intra | 5.4   | 0.023 |

\*The production run of 3000 ps have been used to average interactions between amino-acid residues every 5 ps.

\*\* Interaction within same chain is marked as “intra” and between two different chains “inter”

**Table S3.** Comparison of docking poses populations of ligands at EC, IC and outer mouth of selectivity filter (SF) of hERG; their close contacts with target and binding scores of top poses at focused region derived by AUTODOCK.

|            | IC (%) | Outer mouth of SF (%) | EC (%) |
|------------|--------|-----------------------|--------|
| Dofetilide | 93     | 5                     | 2      |

|       | IC (%) | Outer mouth of SF (%) | EC (%) |
|-------|--------|-----------------------|--------|
| KN-93 | 58     | 38                    | 4      |

| NFA           | IC (%) | Outer mouth of SF (%) | EC (%) |
|---------------|--------|-----------------------|--------|
| NFA (neutral) | 6      | 28                    | 66     |
| NFA (anion)   | 12     | 17                    | 71     |

| <b>Dofetilide</b> | <b>Close contacts</b>                                          |
|-------------------|----------------------------------------------------------------|
| IC site           | Leu622, Thr623, Ser624, Val625, Gly626, Ser649, Tyr652, Phe656 |

| <b>KN-93</b>      | <b>Close contacts</b>                                          |
|-------------------|----------------------------------------------------------------|
| IC site           | Leu622, Thr623, Ser624, Val625, Gly626, Ser649, Tyr652, Phe656 |
| Outer mouth of SF | Ser600, Gly601, Asn629, Gly628, Ser631, Phe627                 |

| <b>NFA (anion)</b> | <b>Close contacts</b>                                                                                  |
|--------------------|--------------------------------------------------------------------------------------------------------|
| EC site            | Glu438, Glu437, Lys434, Thr436, Met574, Lys525, Leu433, Glu435, Lys595, Lys610                         |
| Outer mouth of SF  | Leu602, Asn598, Ser600, Tyr597, Ser599, Asn629, Val630, Ser631, Gly601, Tyr616, Pro632, Asn633, Thr634 |

| <b>NFA (neutral)</b> | <b>Close contacts</b>                                                                                  |
|----------------------|--------------------------------------------------------------------------------------------------------|
| EC site              | Glu438, Glu437, Lys434, Thr436, Lys525, Met574, Leu433, Glu435, Lys595, Lys610                         |
| Outer mouth of SF    | Asn633, Asn629, Ser600, Tyr616, Leu602, Glu637, Thr634, Lys638, Asn635, Asn629, Tyr597, Asn598, Ser599 |

| <b>Ligands</b> | <b>Binding Score (kcal/mol)</b> |
|----------------|---------------------------------|
| Dofetilide     | -8.26                           |
| KN-93          | -9.22                           |
| NFA (neutr.)   | -7.36                           |
| NFA (anion)    | -6.33                           |

**Table S4.** Comparison of docking poses populations of ligands at EC, IC and outer mouth of selectivity filter (SF) of hERG; their close contacts with target and binding scores of top poses at focused region derived by GOLD.

|            |        |                       |        |
|------------|--------|-----------------------|--------|
|            | IC (%) | Outer mouth of SF (%) | EC (%) |
| Dofetilide | 94     | 6                     | -      |

|       |        |                       |        |
|-------|--------|-----------------------|--------|
|       | IC (%) | Outer mouth of SF (%) | EC (%) |
| KN-93 | 86     | 14                    | -      |

|               |        |                       |        |
|---------------|--------|-----------------------|--------|
| NFA           | IC (%) | Outer mouth of SF (%) | EC (%) |
| NFA (neutral) | -      | 38                    | 62     |
| NFA (anion)   | -      | 23                    | 77     |

|                   |                                                |
|-------------------|------------------------------------------------|
| <b>Dofetilide</b> | <b>Close contacts</b>                          |
| IC site           | Thr623, Ser624, Ser649, Tyr652, Ala653, Phe656 |

|              |                                                                |
|--------------|----------------------------------------------------------------|
| <b>KN-93</b> | <b>Close contacts</b>                                          |
| IC site      | Thr623, Ser624, Met645, Ser649, Tyr652, Ala653, Phe656, Gly657 |

|                    |                                                                        |
|--------------------|------------------------------------------------------------------------|
| <b>NFA (anion)</b> | <b>Close contacts</b>                                                  |
| EC site            | Thr436, Lys595, Tyr569, Ala570, Asn573, Lys610, Thr613, Tyr611, Met574 |
| Outer mouth of SF  | Asn629, Ser600, Tyr597, Asn598, Gly628, Ser631                         |

|                      |                                                                        |
|----------------------|------------------------------------------------------------------------|
| <b>NFA (neutral)</b> | <b>Close contacts</b>                                                  |
| EC site              | Lys595, Asn573, Asn598, Met574, Ala570, Leu602, Thr613, Tyr611, Lys610 |
| Outer mouth of SF    | Tyr597, Gly628, Asn629, Ser600, Phe627, Asn598, Ser599, Ser631         |

| Ligands      | GOLD/ChemScore Binding Score (kcal/mol) | GOLD Fitness Score |
|--------------|-----------------------------------------|--------------------|
| Dofetilide   | -8.07                                   | 63.59              |
| KN-93        | -8.48                                   | 67.85              |
| NFA (neutr.) | -6.41                                   | 47.17              |
| NFA (anion)  | -6.37                                   | 43.85              |



## hERG1 +3 alignment

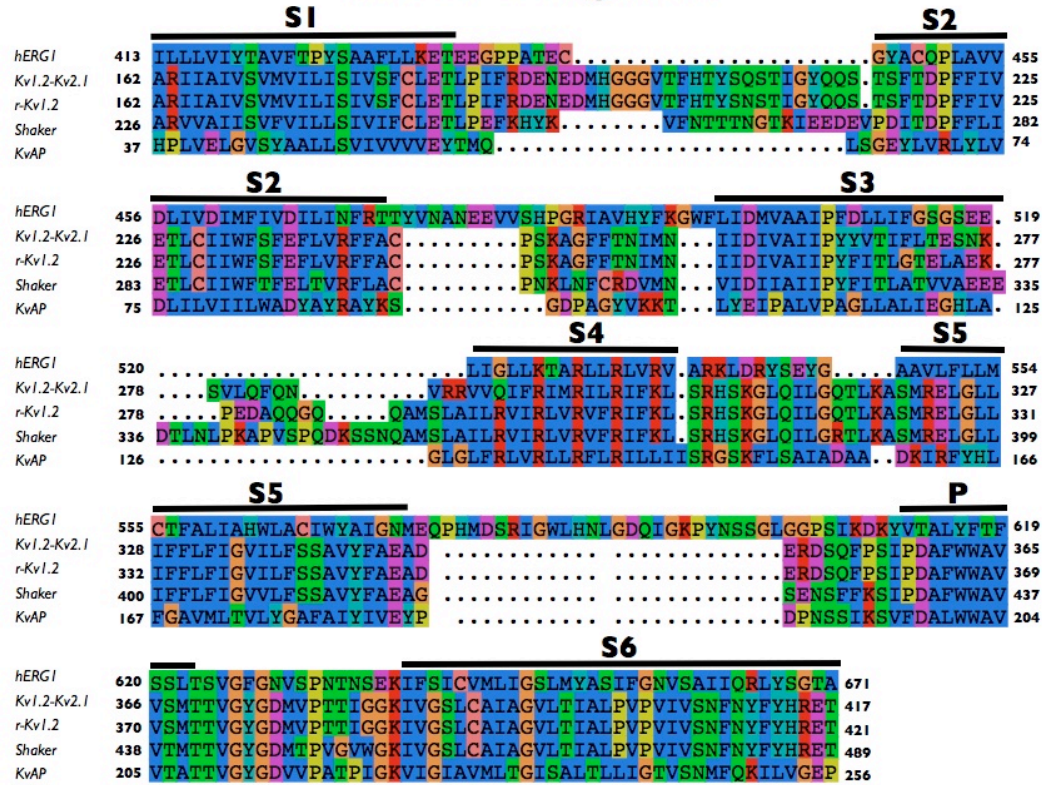

(ii)



**Figure S2.** Representation of partitioned docking (the channel was mapped using a cross-section of one of four VS domains together with the pore domain region (highlighted regions at the Figure, top view)).

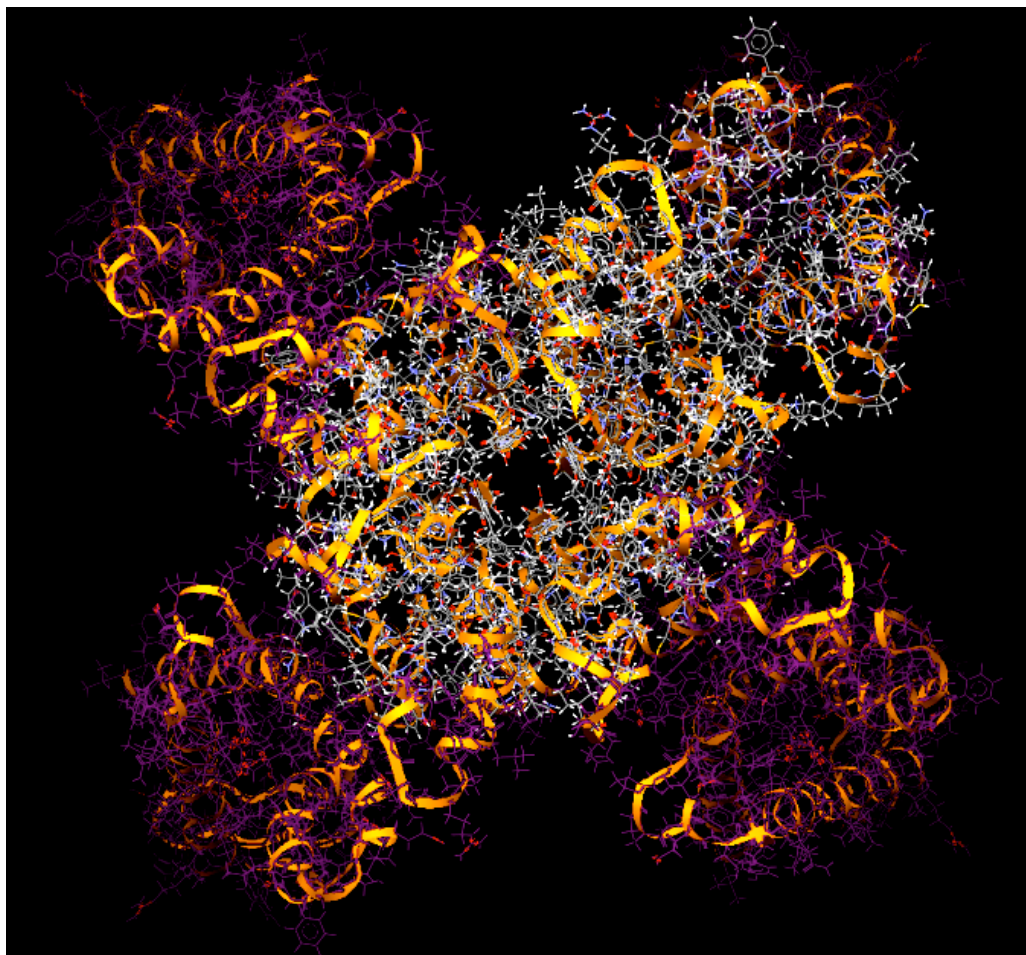

**Figure S3.** Binding interactions of ligands at hERG. Yellow and green dashed bonds show H-bonds and close-van der Waals contacts, respectively.

*(i) Top docking poses derived by AUTODOCK*

*Dofetilide at IC (top view)*

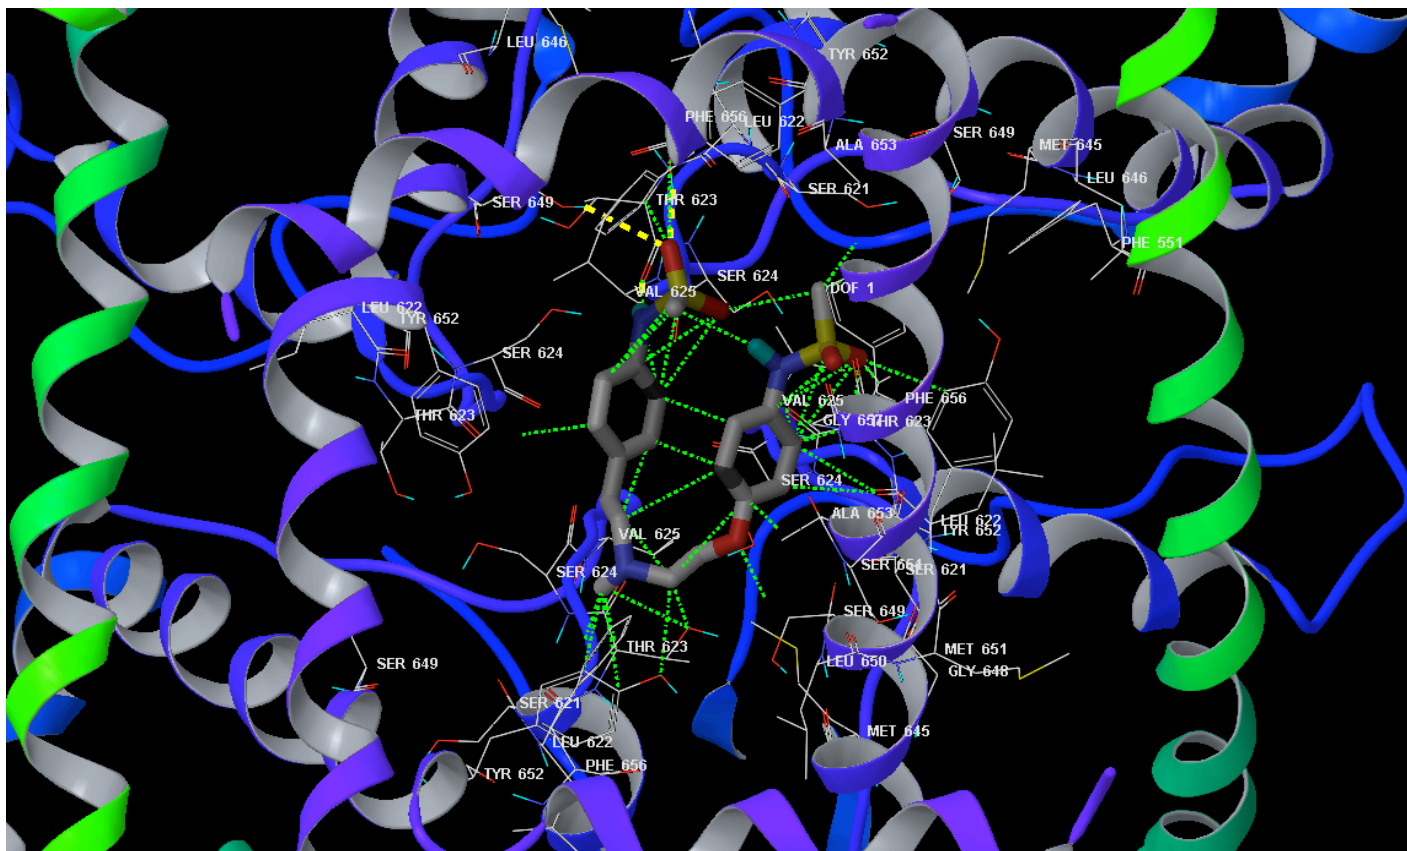



*NFA at EC (top view)*

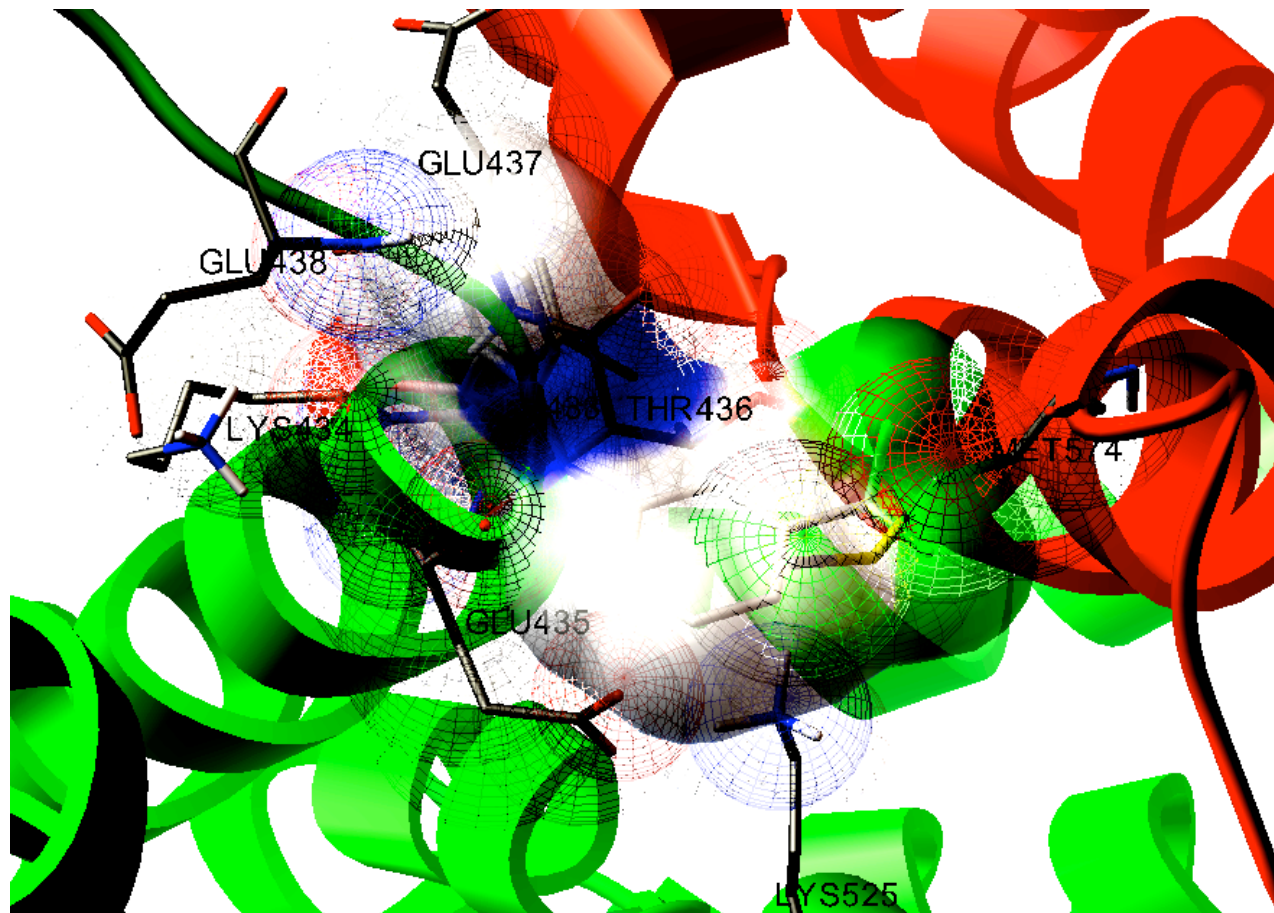

*NFA* (superimposition of its neutral and anionic forms) at EC

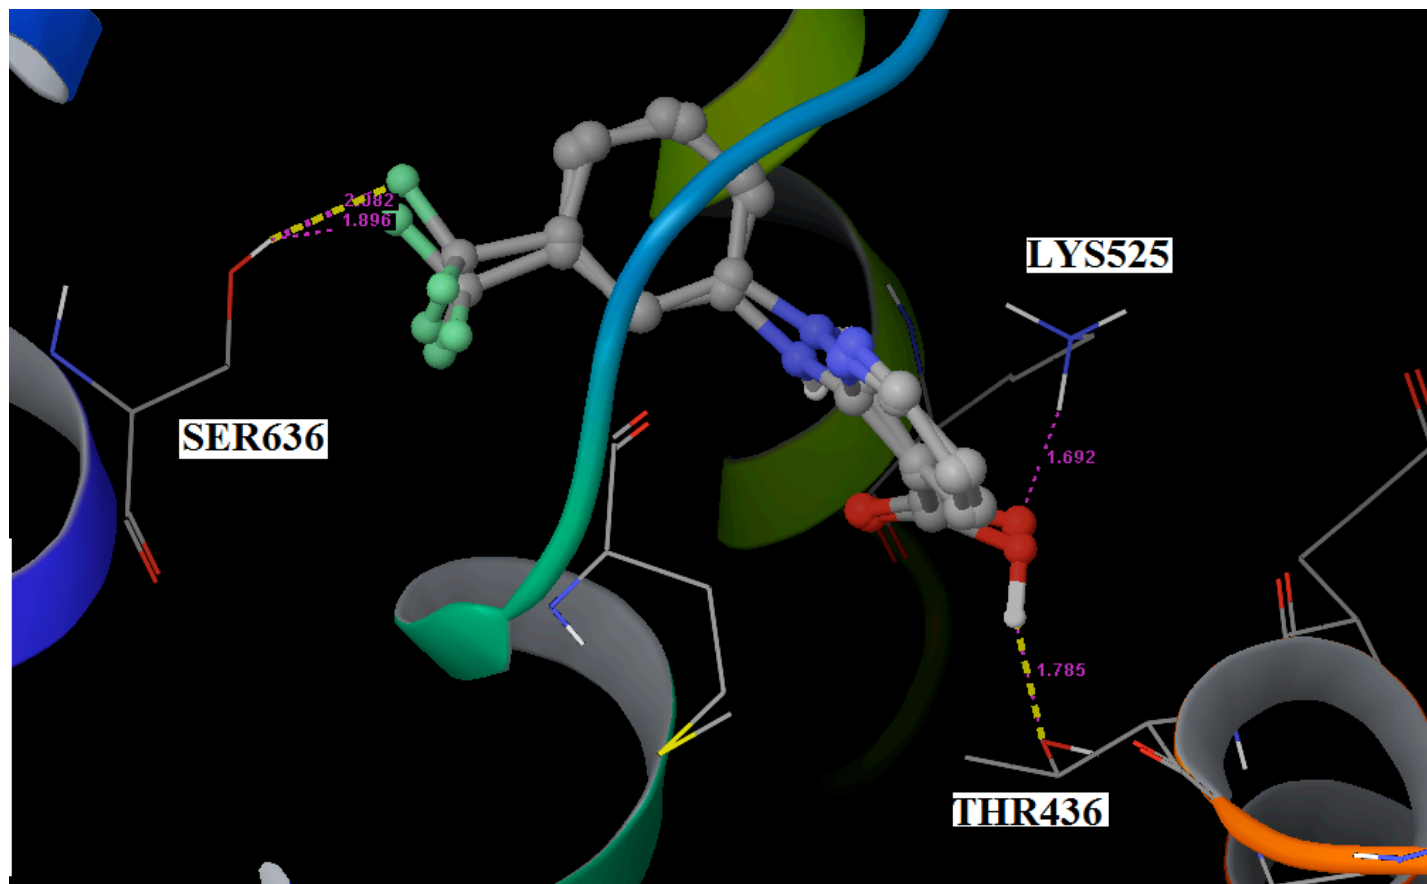



*KN93 at IC (top view)*

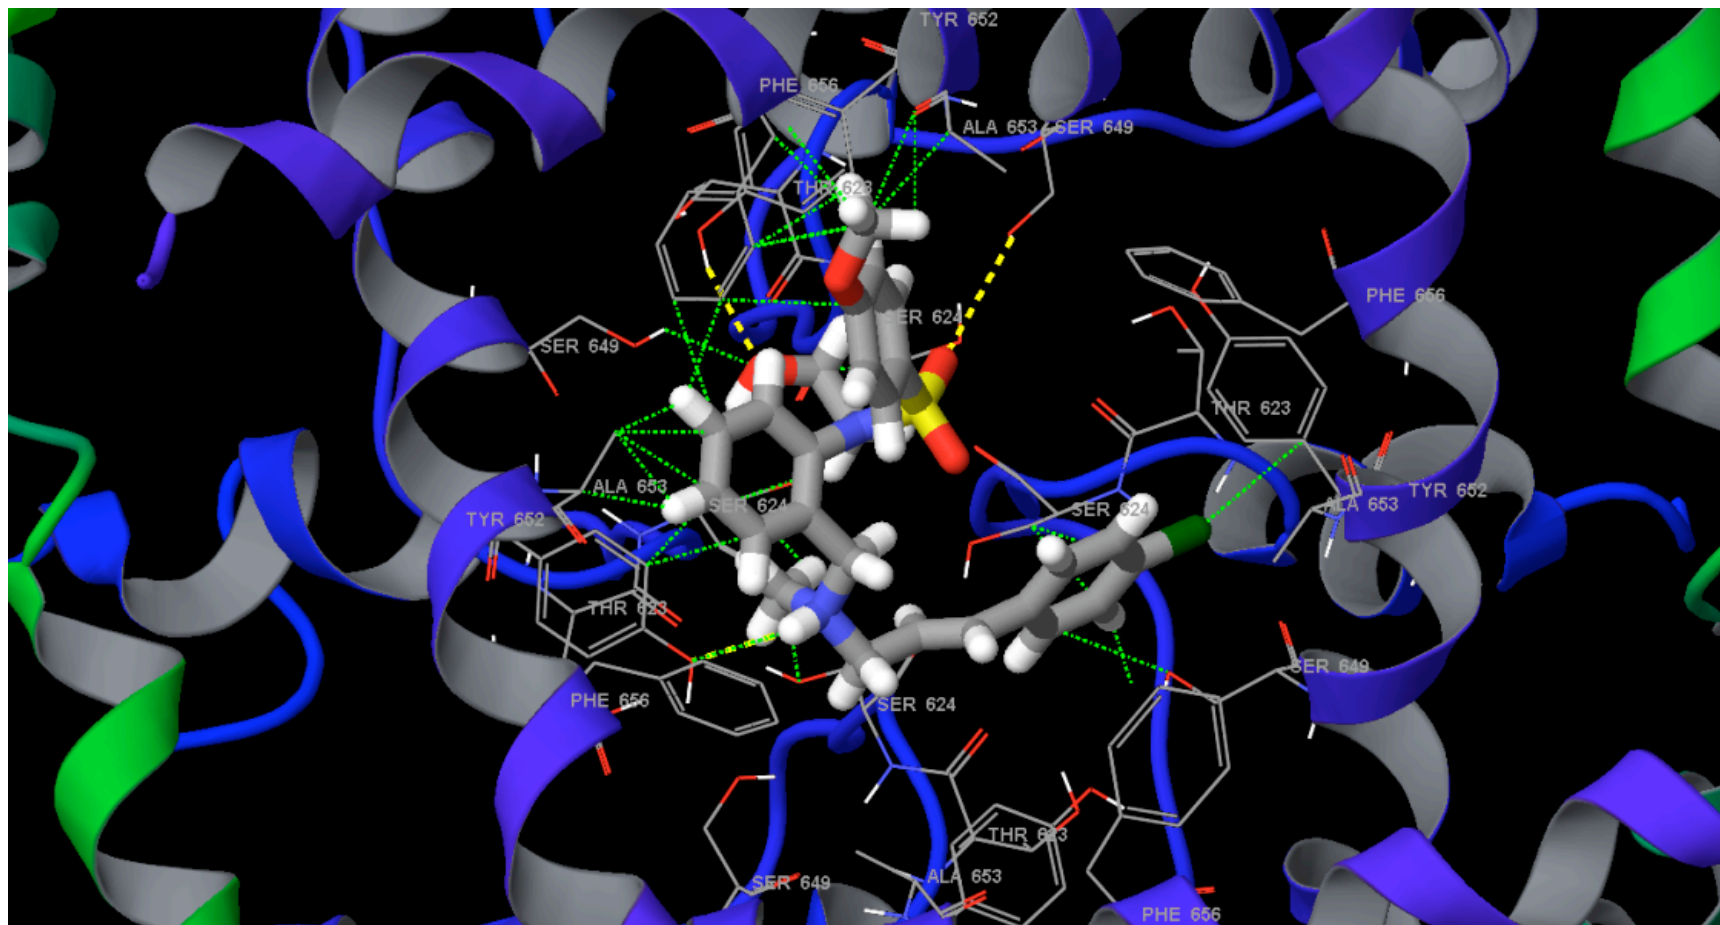

*NFA at EC (top view)*

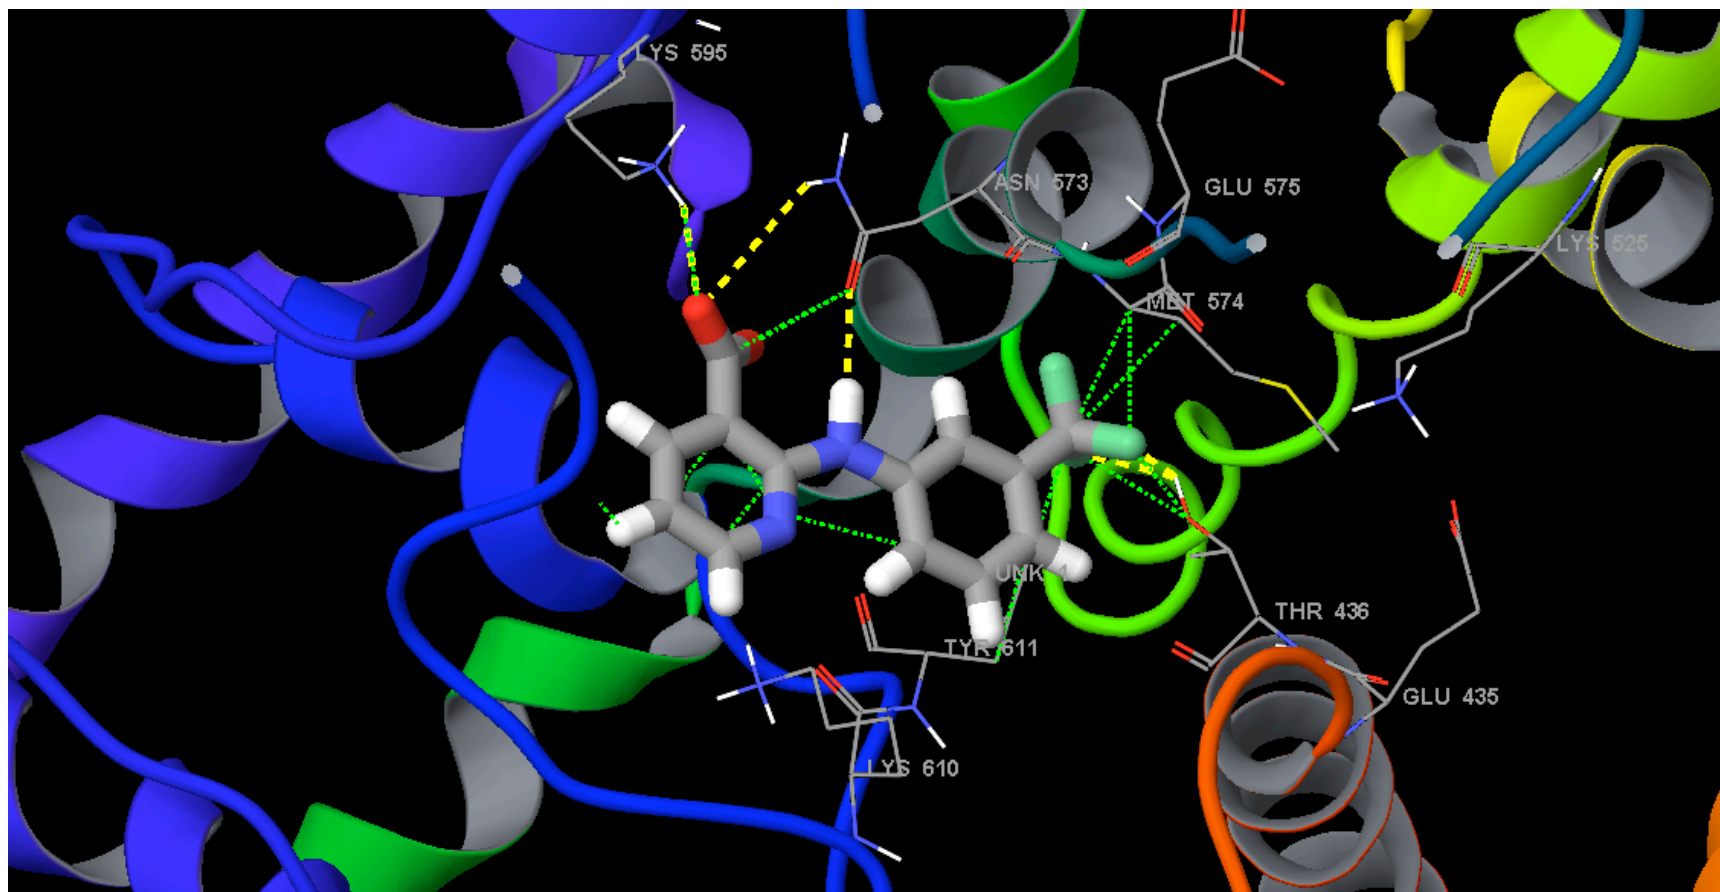



*NFA* (superimposition of its neutral (shown in sticks drawing) and anionic (shown in ball and sticks drawing) forms) at EC

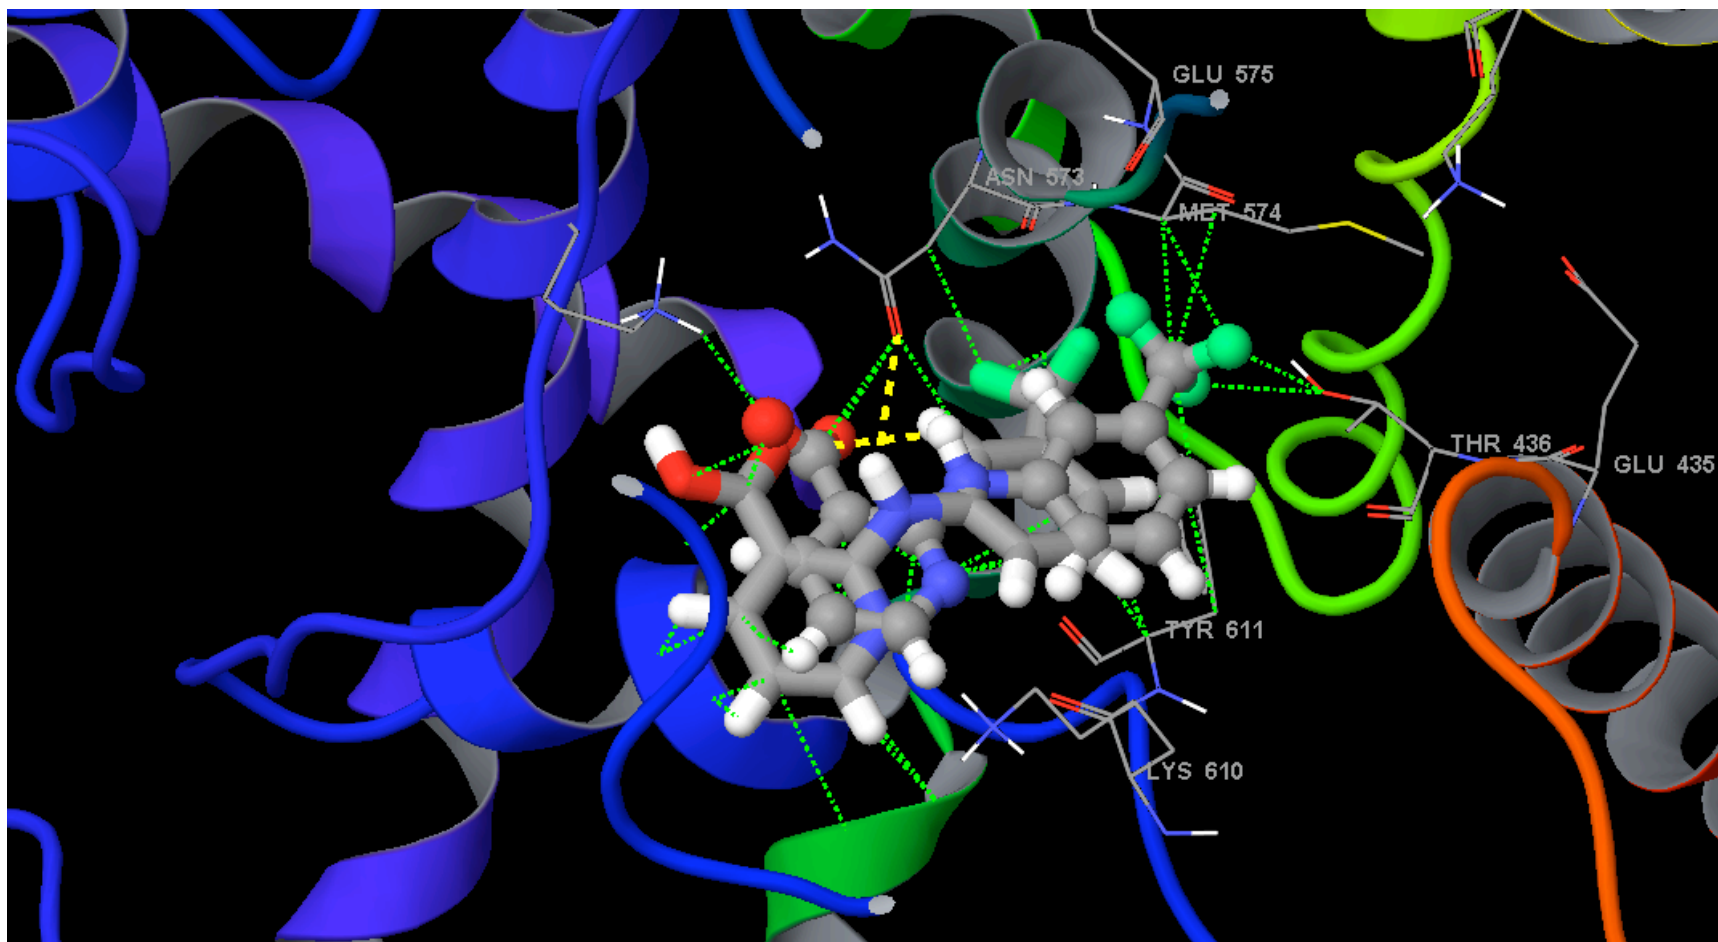

Supplement: NIHMS224718-supplement-Supp_Fig_S1-S3___Table_S1-S4.pdf [file NIHMS224718-supplement-Supp_Fig_S1-S3___Table_S1-S4.pdf]
